# Supplementary material for: Assembly and Rearrangement of Particles Confined at a Surface of a Droplet, and Intruder Motion in Electro-Shaken Particle Films
Source: MDPI journal article supplement (doi:10.3390/ma9080679), 2016-08-10
Supplement: s1 [file s1]

# Supplementary Materials: Assembly and Rearrangement of Particles Confined at a Surface of a Droplet, and Intruder Motion in Electro-Shaken Particle Films

Zbigniew Rozynek, Milena Kaczmarek-Klinowska and Agnieszka Magdziarz

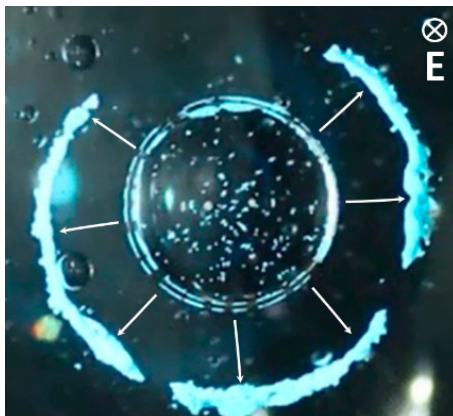

**Figure S1.** Detachment of surface microparticles from a silicone oil droplet. Initially, the stable particle film was formed using  $E$ -field of  $200 \text{ Vmm}^{-1}$ , DC. When the polarization of the  $E$ -field changes and its intensity is increased to more than  $800 \text{ Vmm}^{-1}$ , the particle film undergoes one cycle of shaking. At the compression stage, the compressed particle film starts to crumple and eventually irreversibly detach (some or all particles depending on the  $E$ -field strength) from the surface of the droplet. The droplet is imaged parallel to the direction of  $E$ -field through transparent electrodes. The diameter of the droplet is  $\sim 1.7 \text{ mm}$ .

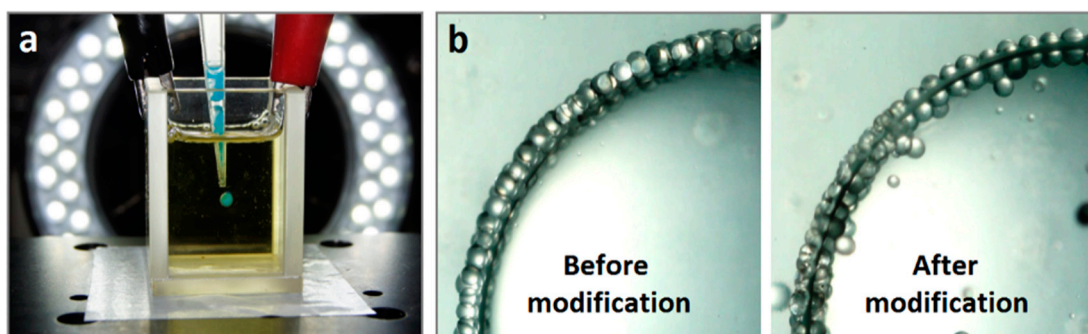

**Figure S2.** (a) The sample cell was made of glass ( $15 \text{ mm} \times 15 \text{ mm} \times 30 \text{ mm}$ ) where two of the walls are coated with electrically conductive ITO layers. The high-voltage bipolar signal was provided to the cell via two crocodile clips attached to the ITO electrodes. The transparent ITO electrodes allow for observation in a direction along the electric field. A droplet containing colloidal particles is made using a mechanical pipette; (b) Modification of the surface chemistry of the polystyrene particles (PS140) resulted in a change of their contact angle at the castor oil–silicone oil interface.
