# Supplementary material for: Assembly and Rearrangement of Particles Confined at a Surface of a Droplet, and Intruder Motion in Electro-Shaken Particle Films
Source: Materials (Basel). 2016 Aug 10;9(8):679. doi: 10.3390/ma9080679 (PMC5510736; doi:10.3390/ma9080679)
Supplement: Supplementary file 1 [file materials-09-00679-s001.zip]

Archive with 5 entries (5 files):
- Materials-137577-supp.pdf
- Movie S1 with text.mp4
- Movie S2 with text.mp4
- Movie S3 with text.mp4
- Movie S4 with text.mp4
